# Supplementary material for: Synergistic Interactions between HDAC and Sirtuin Inhibitors in Human Leukemia Cells
Source: PubMed Central journal article supplement (PMC3144930; doi:10.1371/journal.pone.0022739), 2011-07-27
Supplement: pone.0022739.s002.pdf [file pone.0022739.s002.pdf]

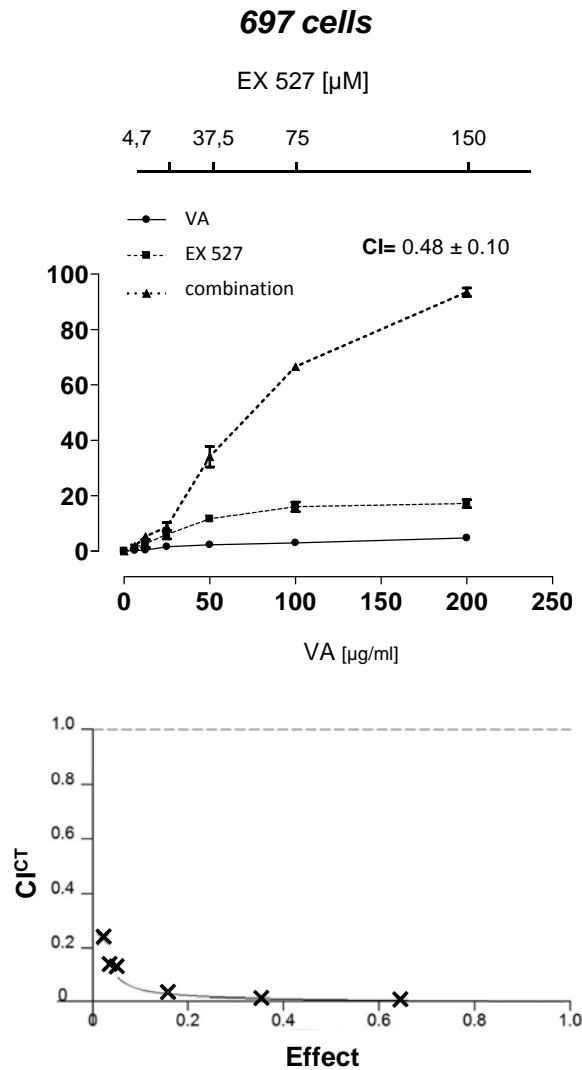

**Figure S2. EX527 and VA cooperate in 697 cells.** 697 cells were incubated with or without EX527 or VA at the indicated concentrations. Viability was assessed 48 h later by PI cell staining and flow cytometry. CI values refer to the highest drug concentrations used. The CI<sup>CT</sup>s for the different drug combinations are presented in the lower insets.
