# Supplementary material for: Synergistic Interactions between HDAC and Sirtuin Inhibitors in Human Leukemia Cells
Source: PubMed Central journal article supplement (PMC3144930; doi:10.1371/journal.pone.0022739), 2011-07-27
Supplement: pone.0022739.s004.pdf [file pone.0022739.s004.pdf]

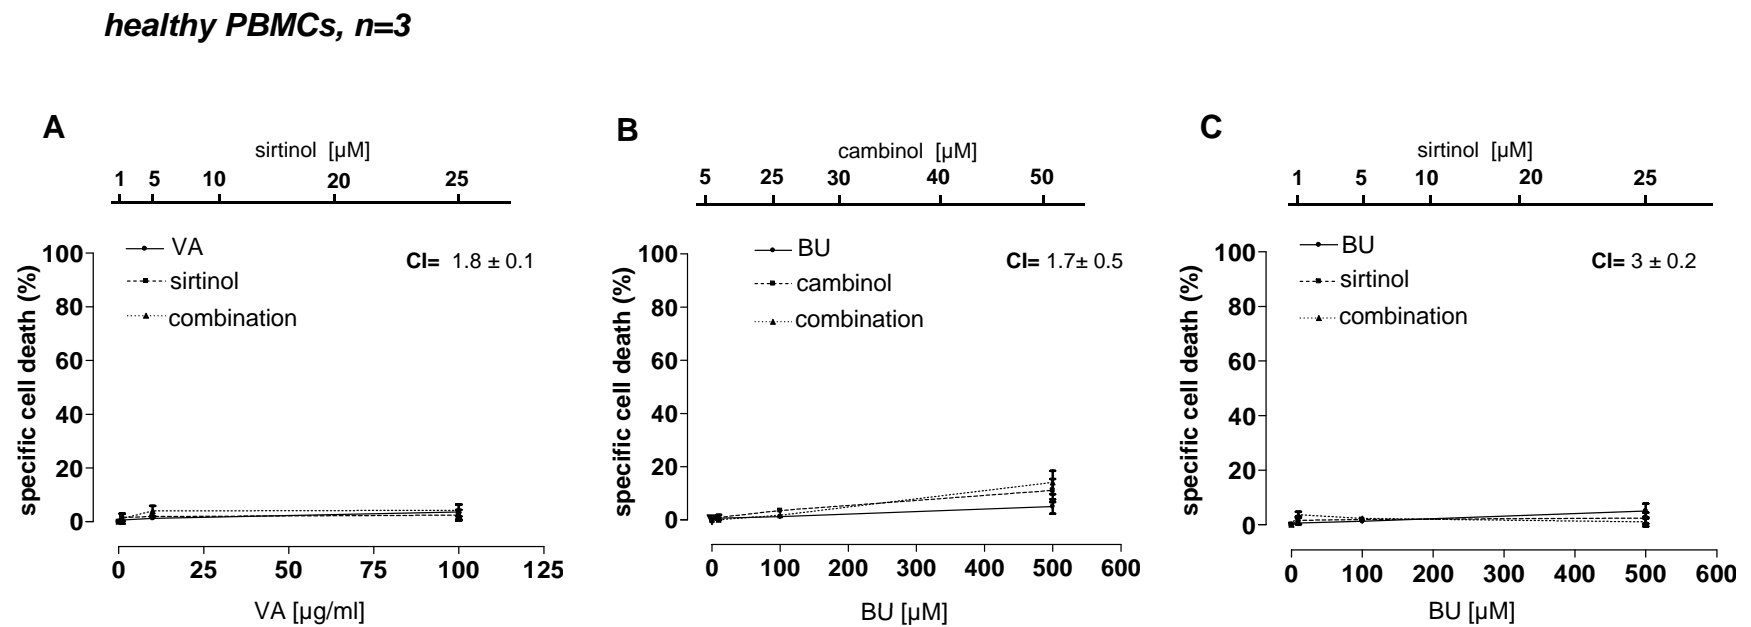

**Figure S4. Sirtuin inhibitors and HDAC inhibitors show poor activity and fail to cooperate in healthy PBMCs.** A-C, Healthy PBMCs were incubated in 96-well plates with or without sirtinol, cambinol, BU, or VA at the indicated concentrations. Viability was assessed 48 h later by PI cell staining and flow cytometry. CI values refer to the highest drug concentrations used. Results are means  $\pm$  SD of three independent experiments with three different donors.
