# Supplementary material for: Synergistic Interactions between HDAC and Sirtuin Inhibitors in Human Leukemia Cells
Source: PubMed Central journal article supplement (PMC3144930; doi:10.1371/journal.pone.0022739), 2011-07-27
Supplement: pone.0022739.s006.pdf [file pone.0022739.s006.pdf]

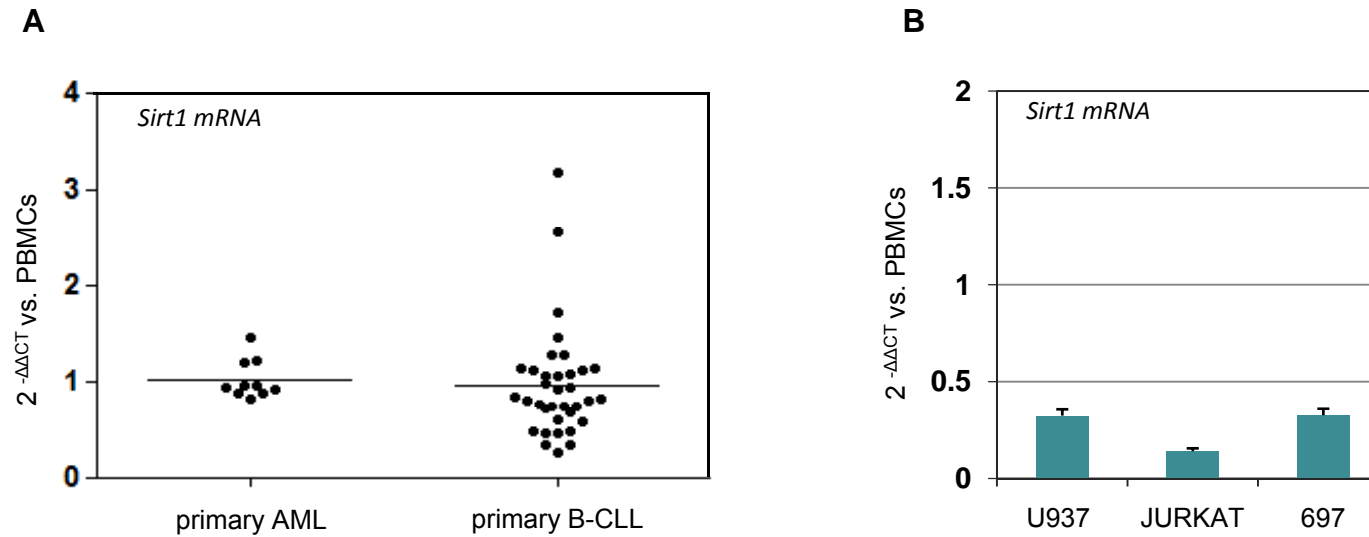

**Figure S6. SIRT1 expression in primary leukemia cells and in leukemia cell lines.** A, RNA was extracted from freshly isolated normal PBMCs (n = 10), primary B-CLL cells (n = 36), AML cells (n = 11), and from the cell lines U937, Jurkat, and 697. SIRT1 levels were determined by Q-PCR. SIRT1 levels in primary leukemia samples (A) and in cell lines (B) were compared to the mean value obtained in PBMCs using the 2<sup>-ΔΔCT</sup> method.
