# Supplementary material for: Synergistic Interactions between HDAC and Sirtuin Inhibitors in Human Leukemia Cells
Source: PubMed Central journal article supplement (PMC3144930; doi:10.1371/journal.pone.0022739), 2011-07-27
Supplement: pone.0022739.s008.pdf [file pone.0022739.s008.pdf]

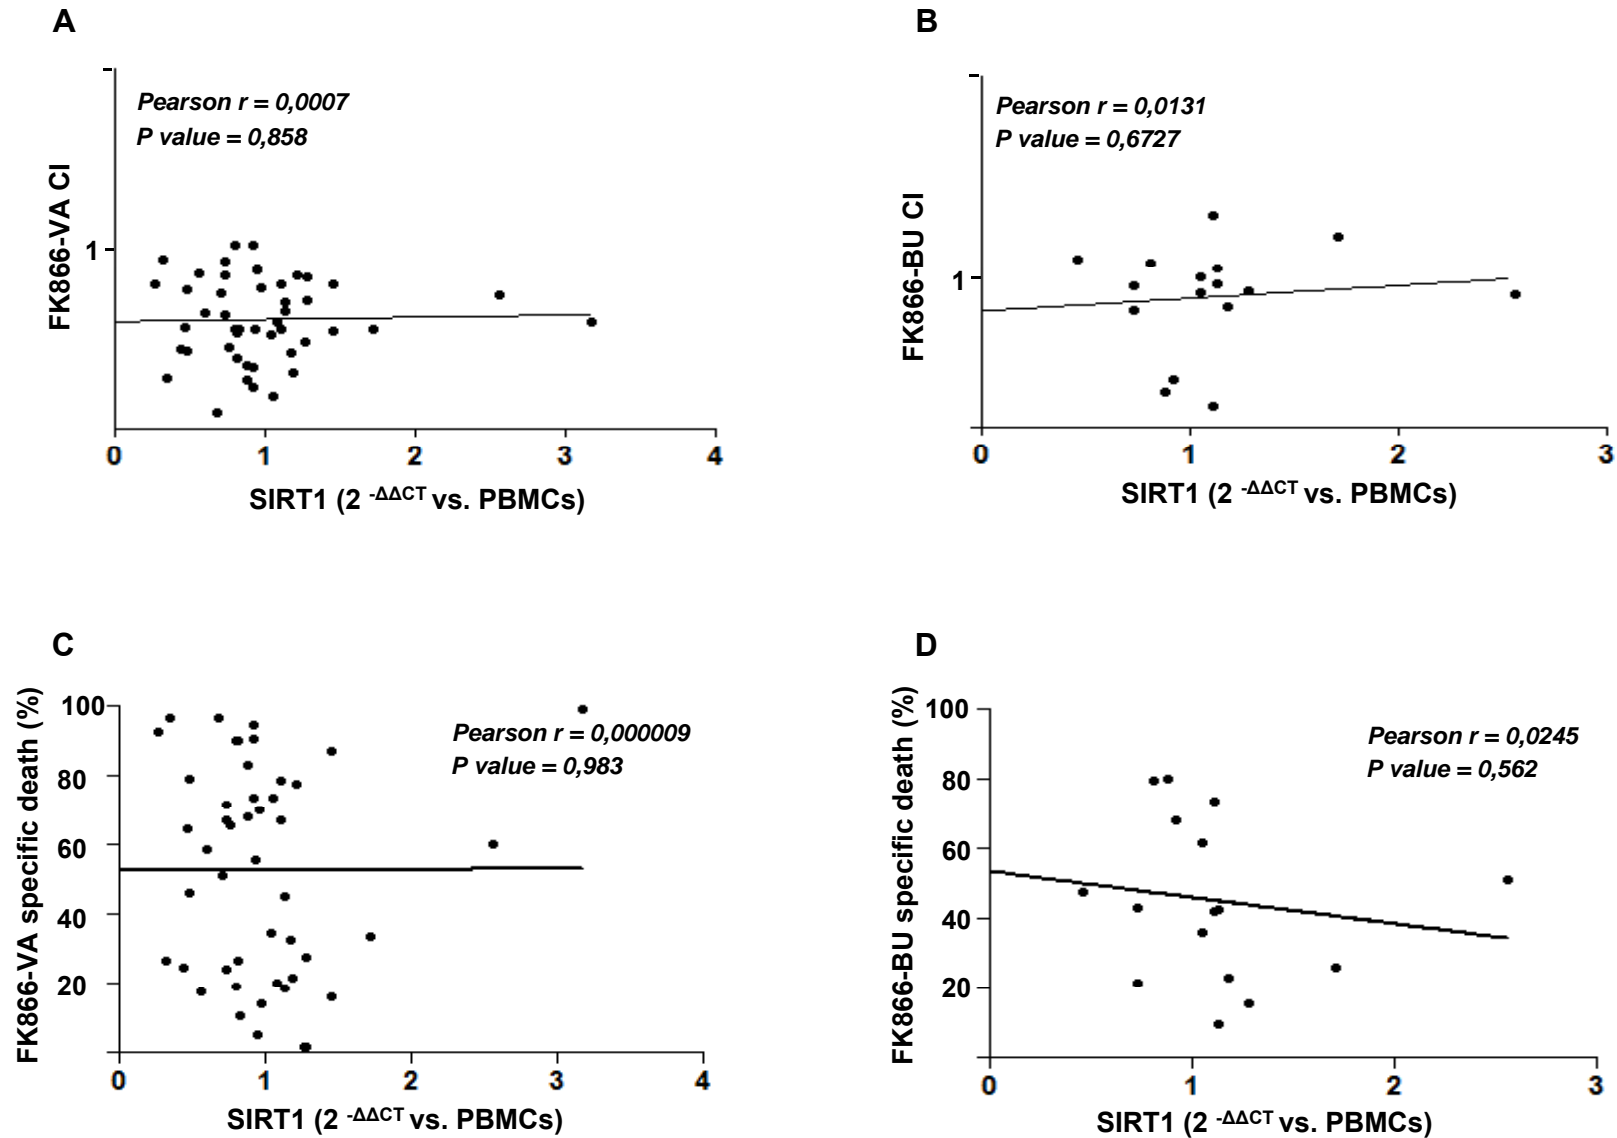

**Figure S8. Correlation between SIRT1 expression and activity of the combination FK866/HDAC inhibitors in leukemia cells.** Primary B-CLL cells were treated with or without 10 nM FK866, 100  $\mu$ g/ml VA, 500  $\mu$ M BU, or their combination. Dead cells were enumerated four days later by PI staining and flow cytometry. The correlation between the CI (A, B) or the overall cytotoxic activity (C, D) of each drug combination and SIRT1 expression was assessed by Pearson correlation coefficient.
