# Supplementary material for: Synergistic Interactions between HDAC and Sirtuin Inhibitors in Human Leukemia Cells
Source: PubMed Central journal article supplement (PMC3144930; doi:10.1371/journal.pone.0022739), 2011-07-27
Supplement: pone.0022739.s010.pdf [file pone.0022739.s010.pdf]

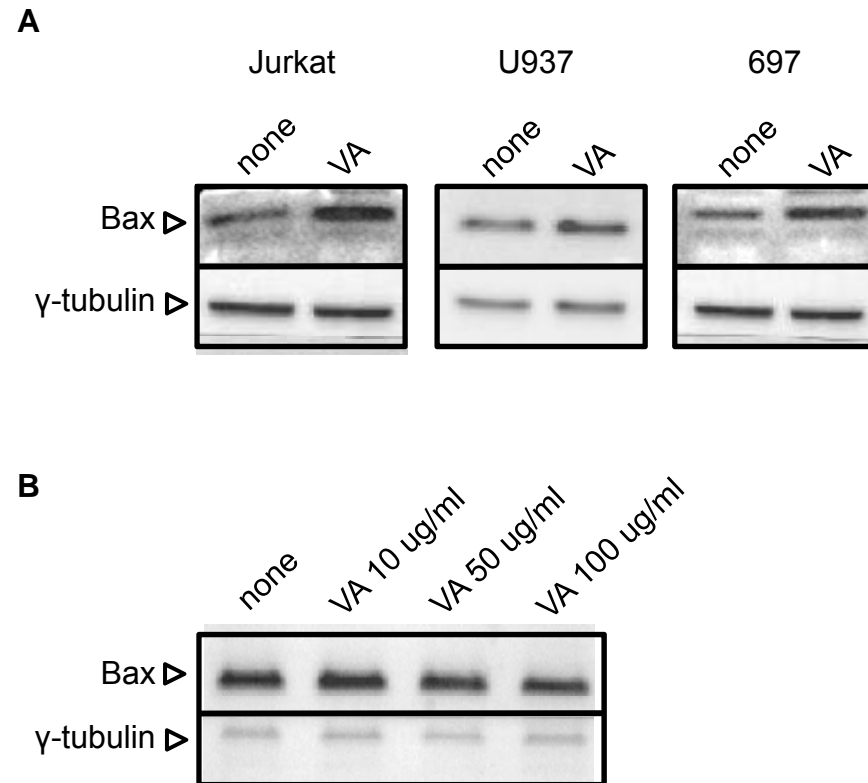

**Figure S10. VA induces Bax upregulation in leukemia cell lines but not in healthy PBMCs.** A,  $3 \times 10^6$  Jurkat, U937, and 697 cells were plated in 6-well plates in the presence or absence of  $100 \mu\text{g/ml}$  VA. Two days later, cells were harvested, washed and used for protein lysate preparation. Bax and  $\gamma$ -tubulin levels were determined by immunoblotting. B,  $10^6$  PBMCs were plates in 3 ml medium in 6-well plates in the presence or absence of the indicated concentrations of VA. Two days later, cells were harvested, washed, and used for cell lysate preparation. Bax and  $\gamma$ -tubulin expression were determined by immunoblotting. A, B one representative experiment out of three is shown.
