# Supplementary material for: Synergistic Interactions between HDAC and Sirtuin Inhibitors in Human Leukemia Cells
Source: PubMed Central journal article supplement (PMC3144930; doi:10.1371/journal.pone.0022739), 2011-07-27
Supplement: pone.0022739.s011.pdf [file pone.0022739.s011.pdf]

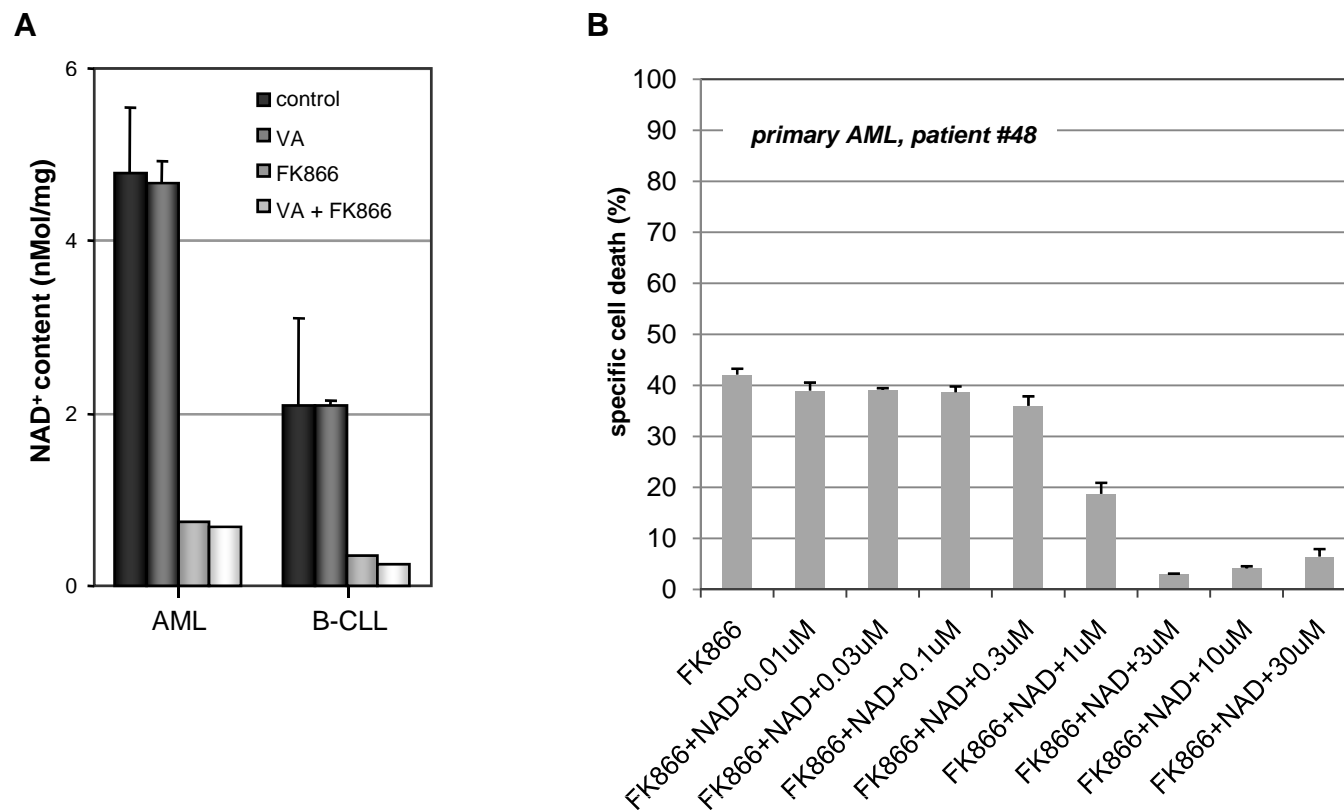

**Figure S11. FK866-mediated NAD<sup>+</sup> depletion mediates FK866's cytotoxic activity.** A, Primary B-CLL and AML cells were incubated in 24-well plates in the presence or absence of 10 nM FK866, 100  $\mu$ g/ml VA, 500  $\mu$ M BU, or their combination. 48 h later, NAD<sup>+</sup> levels were determined by enzymatic cycling assay. NAD<sup>+</sup> values were normalized to protein concentrations (expressed in mg). B, Primary AML cells were plated in 96-well plates and incubated with 100 nM FK866. NAD<sup>+</sup> was added to the medium every 12 h in order to achieve the indicated concentrations. Viability was quantified after 96 h of incubation by PI staining and flow-cytometry.
