# Supplementary material for: Synergistic Interactions between HDAC and Sirtuin Inhibitors in Human Leukemia Cells
Source: PubMed Central journal article supplement (PMC3144930; doi:10.1371/journal.pone.0022739), 2011-07-27
Supplement: pone.0022739.s012.pdf [file pone.0022739.s012.pdf]

**Primary B-CLL cells, patient #36**

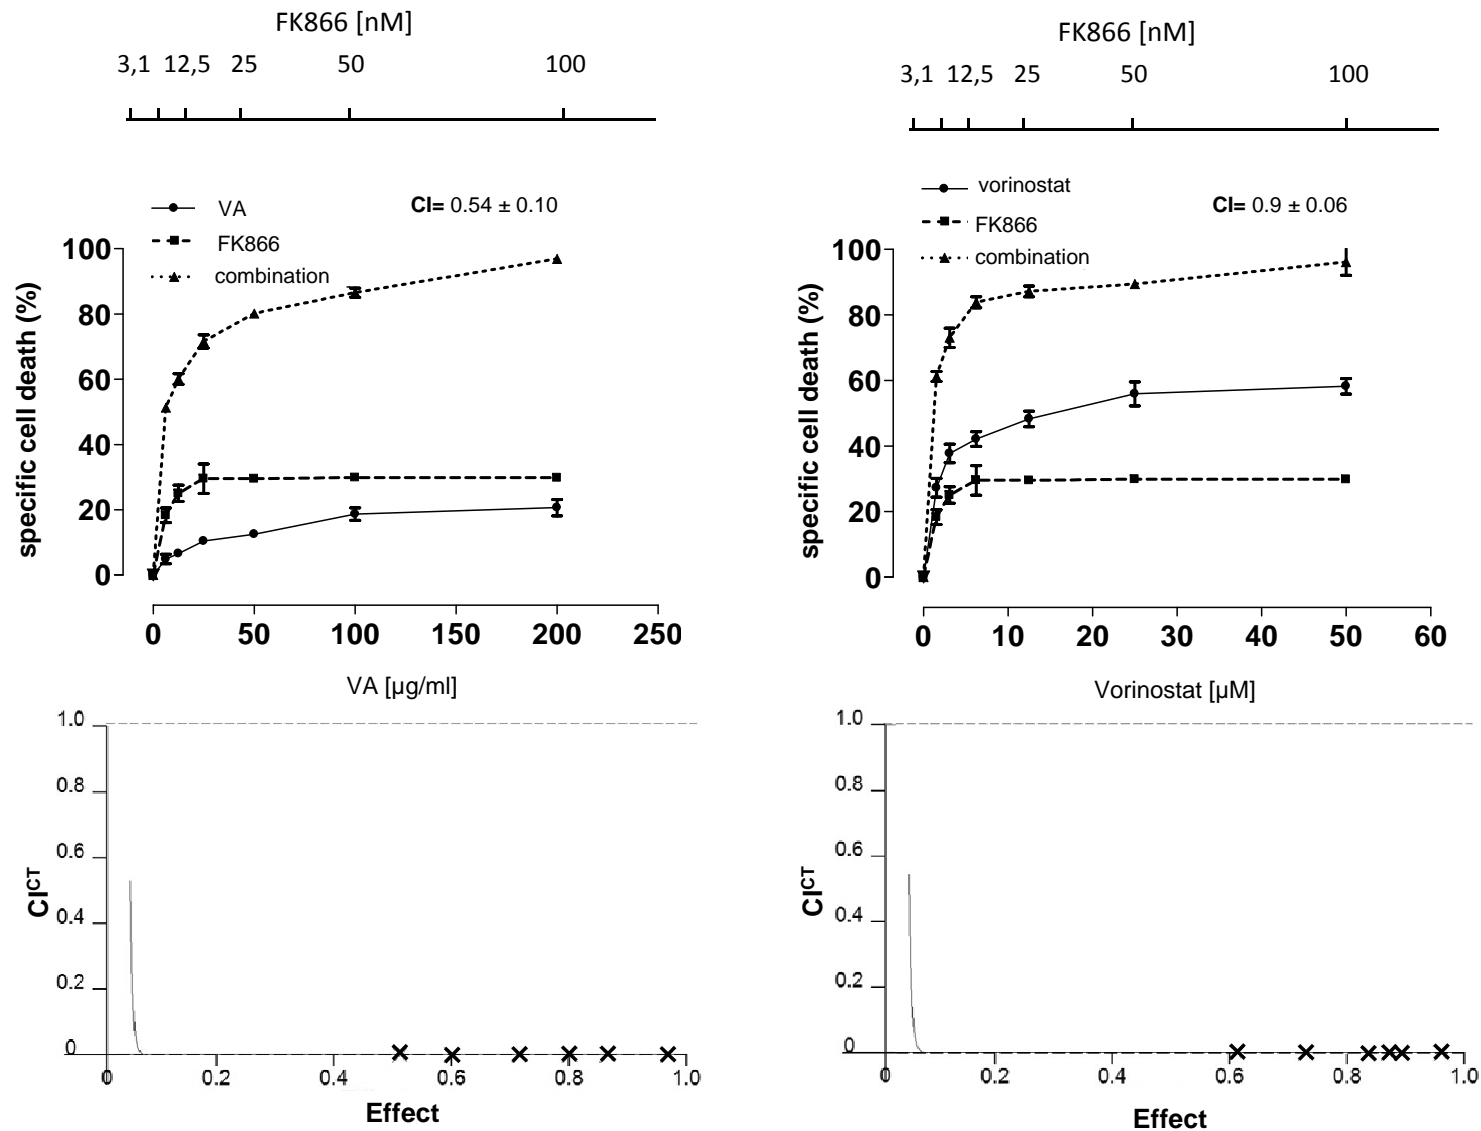

**Figure S12. FK866 and HDAC inhibitors synergistically kill primary B-CLL cells.** Primary B-CLL cells were incubated with or without FK866 at the indicated concentrations for 48 h. Thereafter, VA or vorinostat were added at the indicated concentrations. Viability was assessed 48 h later by PI cell staining and flow cytometry. CI values refer to the highest drug concentrations used. CI<sup>CT</sup>s for each drug combination are presented in the lower insets.
