# Supplementary material for: Synergistic Interactions between HDAC and Sirtuin Inhibitors in Human Leukemia Cells
Source: PubMed Central journal article supplement (PMC3144930; doi:10.1371/journal.pone.0022739), 2011-07-27
Supplement: pone.0022739.s014.pdf [file pone.0022739.s014.pdf]

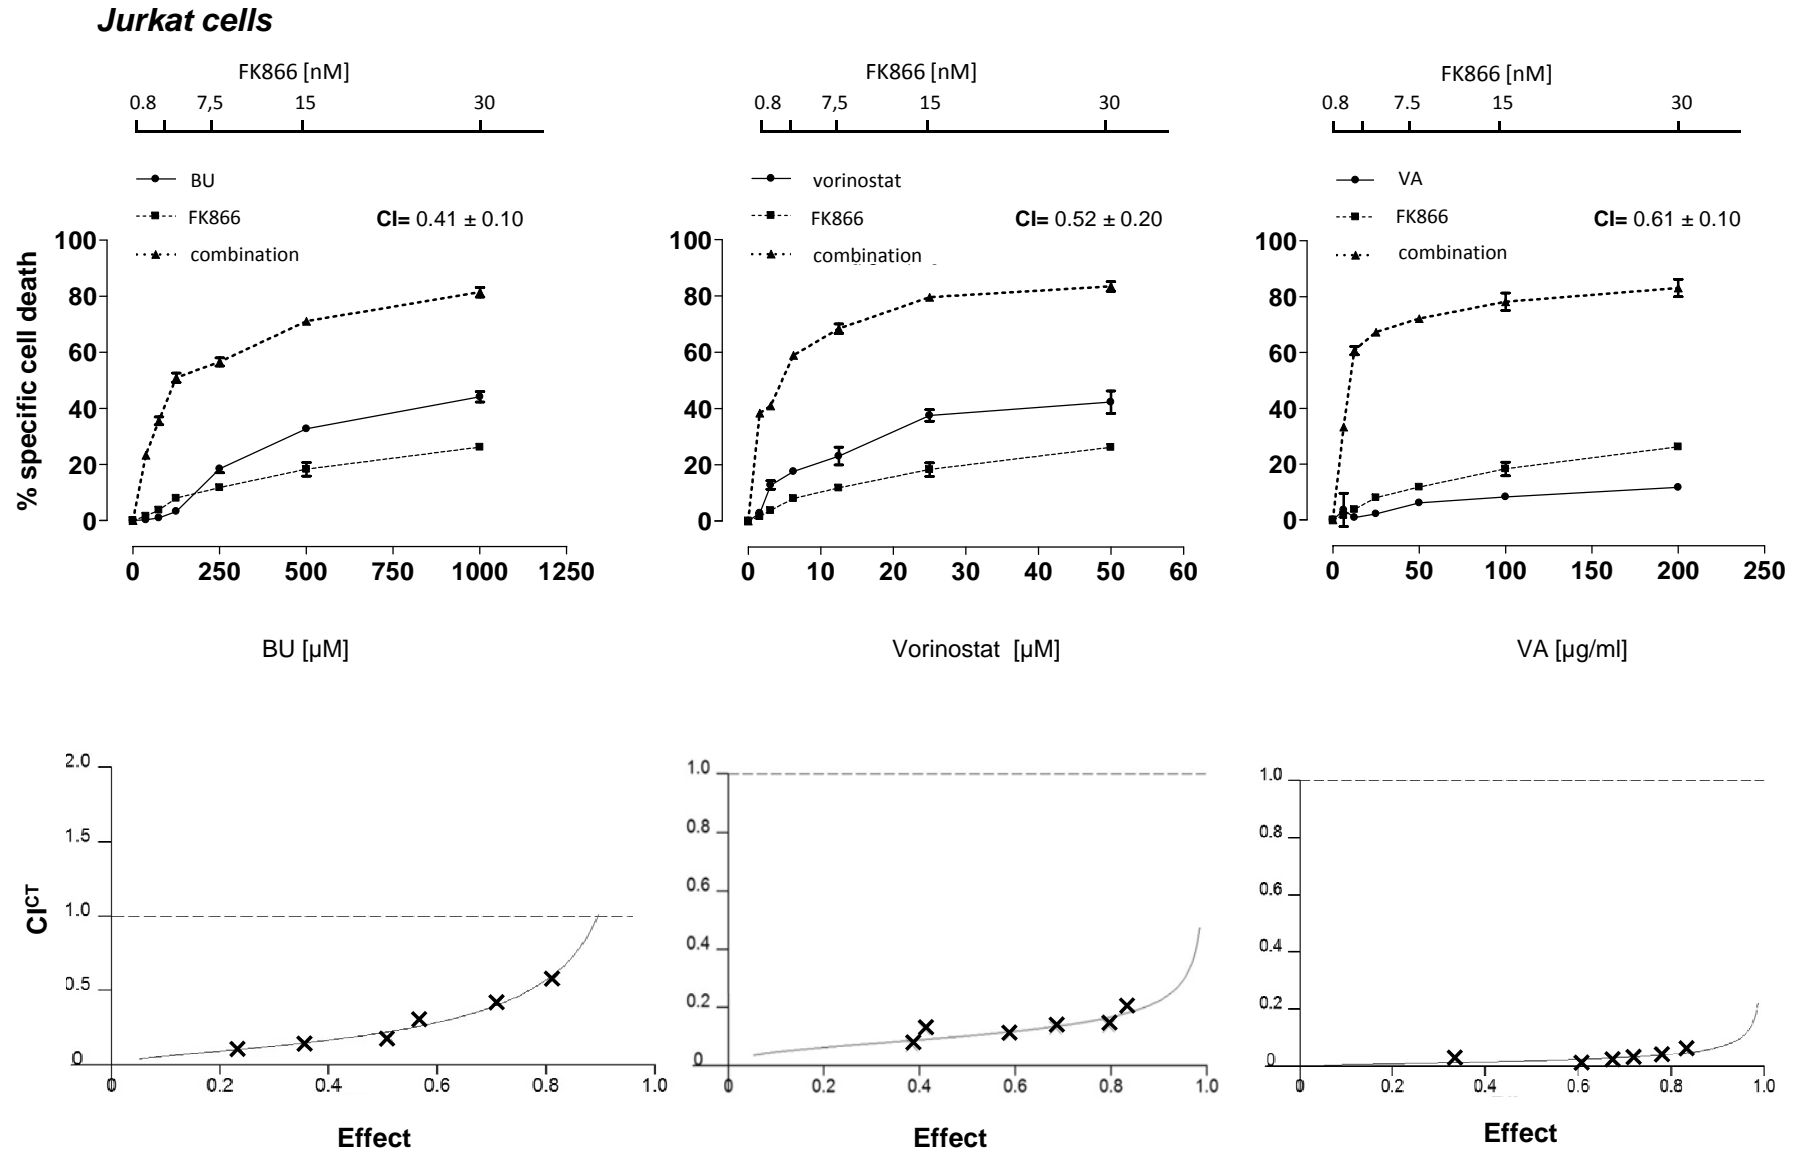

**Figure S14. Synergistic interaction between FK866 and HDAC inhibitors in Jurkat cells.** Jurkat cells were incubated with or without FK866 at the indicated concentrations for 48 h. Thereafter, VA, vorinostat, or BU were added at the indicated concentrations. Viability was assessed 48 h later by PI cell staining and flow cytometry. CI values refer to the highest drug concentrations used. CI<sup>CT</sup>s for each drug combination are presented in the lower insets.
