# Supplementary material for: Synergistic Interactions between HDAC and Sirtuin Inhibitors in Human Leukemia Cells
Source: PubMed Central journal article supplement (PMC3144930; doi:10.1371/journal.pone.0022739), 2011-07-27
Supplement: pone.0022739.s016.pdf [file pone.0022739.s016.pdf]

**Table S1. Synergistic interactions between cambinol and VA in primary leukemia cells**

| Patient no. | VA    | 50 $\mu$ M camb. | 25 $\mu$ M camb. | 5 $\mu$ M camb. | VA+ 50 $\mu$ M camb. | VA+ 25 $\mu$ M camb. | VA+ 5 $\mu$ M camb. |
|-------------|-------|------------------|------------------|-----------------|----------------------|----------------------|---------------------|
| #3          | 16,02 | 10,43            | 9,56             | 8,45            | 34<br>(0,77)         | 26,78<br>(0,95)      | 25,06<br>(0,97)     |
| #9          | 2,51  | 43,95            | 27,58            | 5,84            | 59,61<br>(0,77)      | 44,47<br>(0,67)      | 27,09<br>(0,30)     |
| #11         | 0,11  | 0,46             | 0,22             | 0,14            | 16,06<br>(0,03)      | 13,86<br>(0,01)      | 2,65<br>(0,22)      |
| #12         | 0,77  | 6,91             | 1,08             | 0,45            | 23,1<br>(0,33)       | 16,45<br>(0,06)      | 11,42<br>(0,64)     |
| #13         | 19,93 | 17,72            | 11,23            | 6,23            | 45,25<br>(0,83)      | 40,01<br>(0,77)      | 32,56<br>(0,8)      |
| #19         | 0,8   | 22,84            | 3,87             | 1,54            | 61,28<br>(0,38)      | 11,65<br>(0,33)      | 4,61<br>(5,28)      |
| #24         | 27,85 | 34,76            | 23               | 18,76           | 68,97<br>(0,90)      | ND                   | 48,65<br>(0,95)     |
| #27         | 0,79  | 4,83             | 3,65             | 2,65            | 29,87<br>(0,18)      | 22,65<br>(0,15)      | 10,06<br>(0,74)     |
| #33         | 5,41  | 1,42             | 0,64             | 0,4             | 7,35<br>(0,93)       | 6,19<br>(0,97)       | 5,16<br>(1,12)      |
| #41         | 6     | 2,34             | 1,35             | 1,54            | 19,87<br>(0,42)      | 16,79<br>(0,08)      | 15<br>(0,25)        |
| #42         | 1,14  | 0,42             | 5,66             | 4,56            | 26,87<br>(0,05)      | 24,08<br>(0,23)      | 9,76<br>(0,51)      |
| #46         | 5     | 18,3             | 4,3              | 1,85            | 49,5<br>(0,47)       | 42<br>(0,22)         | 14,2<br>(0,65)      |

Primary B-CLL (#3, #9, #11, #12, #13, #19, #24, #27, #33) or AML (#41, #42, #46) cells were plated in 96 well plates and stimulated with 100  $\mu$ g/ml VA, cambinol (camb.) at the indicated concentrations, or their combinations. Specific cell death was detected four days later by flow cytometry. CIs are indicated in parenthesis. ND: not determined.
