# Supplementary material for: Synergistic Interactions between HDAC and Sirtuin Inhibitors in Human Leukemia Cells
Source: PubMed Central journal article supplement (PMC3144930; doi:10.1371/journal.pone.0022739), 2011-07-27
Supplement: pone.0022739.s017.pdf [file pone.0022739.s017.pdf]

**Table S2. Synergistic interactions between cambinol and BU in primary leukemia cells**

| Patient no. | BU    | 50 $\mu$ M camb. | 25 $\mu$ M camb. | 5 $\mu$ M camb. | BU+ 50 $\mu$ M camb. | BU+ 25 $\mu$ M camb. | BU+ 5 $\mu$ M camb. |
|-------------|-------|------------------|------------------|-----------------|----------------------|----------------------|---------------------|
| #9          | 11,28 | 2,95             | 1,58             | 0,84            | 19,61<br>(0,72)      | 14,47<br>(0,88)      | 12,09<br>(1)        |
| #11         | 2,07  | 0,46             | 0,22             | 0,14            | 5,26<br>(0,48)       | 3,23<br>(0,70)       | 2,53<br>(0,87)      |
| #12         | 2,6   | 6,91             | 1,084            | 0,4             | 15,48<br>(0,61)      | 6,11<br>(0,60)       | 3,43<br>(0,87)      |
| #13         | 1,23  | 27,72            | 0,11             | 0,16            | 54,86<br>(0,52)      | 23,54<br>(0,05)      | 2,01<br>(0,69)      |
| #19         | 0,38  | 22,84            | 3,87             | 1,54            | 28,33<br>(0,81)      | 8,13<br>(0,52)       | 3,55<br>(0,54)      |
| #27         | 3,41  | 12,89            | 9,87             | 2,34            | 30,3 (0,53)          | 17,31<br>(0,76)      | 7,79<br>(0,73)      |
| #33         | 3,4   | 1,42             | 0,64             | 0,4             | 8,49<br>(0,56)       | 7,92<br>(0,51)       | 4,03<br>(0,94)      |

Primary B-CLL cells were plated in 96 well plates and stimulated with 500  $\mu$ M BU, cambinol (camb.) at the indicated concentrations, or their combinations. Specific cell death was detected four days later by flow cytometry. CIs are indicated in parenthesis.
