# Supplementary material for: Synergistic Interactions between HDAC and Sirtuin Inhibitors in Human Leukemia Cells
Source: PubMed Central journal article supplement (PMC3144930; doi:10.1371/journal.pone.0022739), 2011-07-27
Supplement: pone.0022739.s018.pdf [file pone.0022739.s018.pdf]

**Table S3. Synergistic interactions between sirtinol and VA in primary leukemia cells**

| Patient nr. | VA    | 25 $\mu$ M sirt. | 5 $\mu$ M sirt. | 1 $\mu$ M sirt. | VA+ 25 $\mu$ M sirt. | VA+ 5 $\mu$ M sirt. | VA+ 1 $\mu$ M sirt. |
|-------------|-------|------------------|-----------------|-----------------|----------------------|---------------------|---------------------|
| #3          | 16,02 | 51,08            | 40,8            | 29,06           | 87,6<br>(0,76)       | 64,96<br>(0,87)     | 55,65<br>(0,81)     |
| #9          | 2,51  | 16,55            | 1,84            | 0,369           | 45,16<br>(0,56)      | 33,79<br>(0,24)     | 16,51<br>(0,41)     |
| #11         | 0,11  | 4,31             | 0,64            | 0,16            | 14,29<br>(0,30)      | 8,1<br>(0,09)       | 3,06<br>(0,08)      |
| #12         | 0,77  | 6,5              | 1,08            | 0,4             | 14,24<br>(0,51)      | 9,11<br>(0,20)      | 2,43<br>(0,48)      |
| #13         | 19,93 | 3,56             | 1,76            | 0,43            | 34,87<br>(0,67)      | 24,81<br>(0,87)     | 20,56<br>(1,14)     |
| #19         | 0,8   | 4,25             | 0,52            | 0,03            | 10,55<br>(0,47)      | 8,97<br>(0,14)      | 6,73<br>(0,12)      |
| #24         | 27,85 | 70,3             | 2,32            | 1,76            | 96,6<br>(1,01)       | 56,48<br>(0,53)     | 24,86<br>(1,19)     |
| #27         | 0,79  | 3                | 1,48            | 1               | 18,31<br>(0,21)      | 15,52<br>(0,14)     | 14,99<br>(0,11)     |
| #33         | 5,41  | 21,21            | 6,06            | 2,62            | 38,13<br>(0,69)      | 26,49<br>(0,43)     | 15,62<br>(0,51)     |
| #36         | 11,3  | 13,5             | 1,56            | 0,34            | 33,56<br>(0,73)      | 15<br>(0,85)        | 2,54<br>(4,5)       |
| #41         | 6     | 9,52             | 5,23            | 4,98            | 81,6<br>(0,19)       | 71,74<br>(0,15)     | 66,11<br>(0,16)     |
| #42         | 1,14  | 0,93             | 0,24            | 0,21            | 13,12<br>(0,15)      | 10,6<br>(0,13)      | 6,3<br>(0,21)       |
| #46         | 7,8   | 6,4              | 0,54            | 0,21            | 57<br>(0,24)         | 17,9<br>(0,46)      | 1,34<br>(5,9)       |

Primary B-CLL (#3, #9, #11, #12, #13, #19, #24, #27, #33, #36) or AML (#41, #42, #46) cells were plated in 96 well plates and stimulated with 100  $\mu$ g/ml VA, sirtinol (sirt.) at the indicated concentrations, or their combinations. Specific cell death was detected four days later by flow cytometry. CIs are indicated in parenthesis.
