# Supplementary material for: Synergistic Interactions between HDAC and Sirtuin Inhibitors in Human Leukemia Cells
Source: PubMed Central journal article supplement (PMC3144930; doi:10.1371/journal.pone.0022739), 2011-07-27
Supplement: pone.0022739.s019.pdf [file pone.0022739.s019.pdf]

**Table S4. Synergistic interactions between sirtinol and BU in primary leukemia cells**

| Patient nr. | BU    | 25 $\mu$ M sirt. | 5 $\mu$ M sirt. | 1 $\mu$ M sirt. | BU+ 25 $\mu$ M sirt. | BU+ 5 $\mu$ M sirt. | BU+ 1 $\mu$ M sirt. |
|-------------|-------|------------------|-----------------|-----------------|----------------------|---------------------|---------------------|
| #3          | 6,02  | 51,08            | 40,8            | 29,06           | 64,89<br>(0,87)      | 51,23<br>(0,91)     | 42,97<br>(0,81)     |
| #9          | 11,28 | 36,55            | 1,84            | 0,369           | 68,09<br>(0,70)      | 51,96<br>(0,25)     | 21,55<br>(0,54)     |
| #11         | 2,07  | 4,31             | 0,64            | 0,16            | 13,48<br>(0,47)      | 8<br>(0,33)         | 2,17<br>(1,02)      |
| #12         | 2,6   | 6,5              | 1,08            | 0,4             | 12,19<br>(0,74)      | 8,18<br>(0,44)      | 1,42<br>(2,11)      |
| #13         | 1,23  | 3,56             | 1,76            | 0,43            | 19,56<br>(0,24)      | 14,76<br>(0,20)     | 9,71<br>(0,17)      |
| #19         | 0,38  | 4,25             | 0,52            | 0,03            | 10,38<br>(0,44)      | 5,73<br>(0,15)      | 2,45<br>(0,16)      |
| #24         | 1,34  | 75,3             | 2,32            | 1,76            | 83,91<br>(0,91)      | 31,97<br>(0,11)     | 10,43<br>(0,29)     |
| #27         | 3,41  | 3                | 1,48            | 1               | 20,3<br>(0,31)       | 10,31<br>(0,47)     | 5,91<br>(0,74)      |
| #33         | 3,4   | 21,21            | 6,06            | 2,62            | 36,92<br>(0,66)      | 13,03<br>(0,72)     | 8,94<br>(0,67)      |
| #41         | 2,23  | 9,52             | 5,23            | 4,98            | 24,78<br>(0,47)      | 11,35<br>(0,65)     | 9,56<br>(0,75)      |
| #42         | 4,78  | 0,93             | 0,24            | 0,21            | 14,83<br>(0,38)      | 10,35<br>(0,48)     | 5,62<br>(0,88)      |

Primary B-CLL (#3, #9, #11, #12, #13, #19, #24, #27, #33) or AML (#41, #42) cells were plated in 96 well plates and stimulated with 500  $\mu$ M BU, sirtinol (sirt.) at the indicated concentrations, or their combinations. Specific cell death was detected four days later by flow cytometry. CIs are indicated in parenthesis.
