# Supplementary material for: Synergistic Interactions between HDAC and Sirtuin Inhibitors in Human Leukemia Cells
Source: PubMed Central journal article supplement (PMC3144930; doi:10.1371/journal.pone.0022739), 2011-07-27
Supplement: pone.0022739.s020.pdf [file pone.0022739.s020.pdf]

**Table S5. Synergistic interactions between FK866 and HDAC inhibitors in primary leukemia cells.**

| <b>Patient nr.</b> | <b>VA</b> | <b>BU</b> | <b>APO 866</b> | <b>VA+FK866</b> | <b>BU+FK866</b> |
|--------------------|-----------|-----------|----------------|-----------------|-----------------|
| 1                  | 1,29      | 3,99      | 43,53          | 73,47 (0,61)    | 61,81 (0,76)    |
| #2                 | 9,08      | 3,17      | 5,09           | 78,72 (0,18)    | 73,41 (0,12)    |
| #3                 | 2,87      | 8,41      | 30,23          | 60,18 (0,55)    | 50,92 (0,75)    |
| #4                 | 1,56      | 5,26      | 23,45          | 33,79 (0,74)    | 26,28 (1,08)    |
| #5                 | 0,67      | ND        | 9,1            | 17,76 (0,55)    | ND              |
| #6                 | 20,86     | ND        | 35,76          | 65,82 (0,86)    | ND              |
| #7                 | 8,43      | ND        | 34,15          | 94,62 (0,45)    | ND              |
| #8                 | 2,9       | ND        | 23,87          | 26,55 (1,01)    | ND              |
| #9                 | 21,4      | ND        | 29,76          | 96,52 (0,53)    | ND              |
| #10                | 2,01      | ND        | 0,34           | 24,51 (0,5)     | ND              |
| #11                | 3,56      | ND        | 18,85          | 50,93 (0,44)    | ND              |
| #12                | 7,26      | 4,22      | 41,32          | 64,35 (0,75)    | 47,6 (0,95)     |
| #13                | 9,9       | 22,9      | 27,72          | 67,17 (0,56)    | 41,89 (0,56)    |
| #14                | 22,9      | 26,42     | 4,76           | 34,57 (0,8)     | 36,29 (0,75)    |
| #15                | 19,69     | ND        | 4,21           | 45,96 (0,52)    | ND              |
| #16                | 1,1       | ND        | 0,03           | 1,46 (0,77)     | ND              |
| #17                | 6,64      | ND        | 5,11           | 13,98 (0,84)    | ND              |
| #18                | 0,21      | ND        | 1,13           | 1,71 (0,78)     | ND              |
| #19                | 7,55      | ND        | 0,19           | 16,12 (0,48)    | ND              |
| #20                | 43,11     | ND        | 8,98           | 96,46 (0,54)    | ND              |
| #21                | 1,07      | ND        | 26,68          | 99,1 (0,28)     | ND              |
| #22                | 9,16      | ND        | 44,6           | 89,89 (0,59)    | ND              |
| #23                | 10,96     | 3,88      | 28,54          | 71,81 (0,55)    | 42,9 (0,66)     |
| #24                | 10,44     | 10,94     | 27,85          | 45,04 (0,85)    | 42,67 (0,9)     |

|     |       |      |       |                |              |
|-----|-------|------|-------|----------------|--------------|
| #25 | 7,95  | 9,35 | 7,85  | 24,3 (0,65)    | 21,49 (0,8)  |
| #26 | 8,92  | ND   | 0,87  | 10,64 (0,92)   | ND           |
| #27 | 8,81  | ND   | 21,79 | 55,63 (0,55)   | ND           |
| #28 | 4,78  | ND   | 9,86  | 26,61 (0,55)   | ND           |
| #29 | 24,78 | ND   | 48,67 | 78,97 (0,93)   | ND           |
| #30 | 18,04 | ND   | 7,14  | 58,55 (0,43)   | ND           |
| #31 | 9,21  | ND   | 50    | 92,51 (0,64)   | ND           |
| #32 | 5,89  | ND   | 10,24 | 20,16 (0,8)    | ND           |
| #33 | 4,78  | 1,07 | 6,89  | 18,52 (0,63)   | 9,82 (0,81)  |
| #34 | 9,77  | 2,85 | 13,2  | 32,81 (0,7)    | 23,31 (0,68) |
| #35 | 4,23  | 4,56 | 7,4   | 27,69 (0,42)   | 15,47 (0,77) |
| #36 | 34,85 | ND   | 20,87 | 77,77 (0,71)   | ND           |
| #37 | 0,45  | ND   | 3,91  | 5,12 (0,85)    | ND           |
| #38 | 17,34 | ND   | 1,81  | 21,76 (0,88)   | ND           |
| #39 | 12,03 | ND   | 15,04 | 87,32 (0,31)   | ND           |
| #40 | 30,28 | 32,7 | 41,95 | 90,28 (0,8)    | 79,76 (0,93) |
| #41 | 17,89 | ND   | 8,72  | 68,23 (0,39)   | ND           |
| #42 | 10,45 | 3,45 | 12,72 | 83,24 ( 0,27 ) | 80 (0,2 )    |
| #43 | 18,32 | ND   | 13,45 | 90,43( 0,35 )  | ND           |
| #44 | 8,74  | 2,37 | 16,51 | 73,34( 0,34 )  | 68,3 (0,27)  |
| #45 | 7,21  | ND   | 9,42  | 70,32( 0,23 )  | ND           |

Primary B-CLL (#1-35) or AML (#37-45) cells were plated in 96 well plates and stimulated with 100 µg/ml VA, 500 µM BU, 10 nM FK866 or their combinations. Specific cell death was detected four days later by PI staining and flow cytometry. CIs are indicated in parenthesis. ND: not determined.
