# Supplementary material for: Synergistic Interactions between HDAC and Sirtuin Inhibitors in Human Leukemia Cells
Source: PubMed Central journal article supplement (PMC3144930; doi:10.1371/journal.pone.0022739), 2011-07-27
Supplement: pone.0022739.s021.pdf [file pone.0022739.s021.pdf]

**Table S6. Clinical and laboratory features of patients with B-CLL**

| Patient no. | Sex | Age, y | Cytogenetics | RAI stage | IgV <sub>H</sub> | Zap70 | CD38 |
|-------------|-----|--------|--------------|-----------|------------------|-------|------|
| #1          | M   | 71     | Nor          | RAI 0     | mutated          | Neg   | Neg  |
| #2*         | F   | 67     | 13q-         | RAI IV    | mutated          | Pos   | Pos  |
| #3*         | F   | 68     | Nor          | RAI IV    | mutated          | Neg   | Neg  |
| #4          | M   | 74     | 17p-         | RAI 0     | unmutated        | Pos   | Pos  |
| #5          | M   | 76     | Nor          | RAI II    | mutated          | Neg   | Neg  |
| #6          | M   | 65     | ND           | RAI IV    | mutated          | Neg   | Neg  |
| #7          | M   | 66     | 17p-         | RAI II    | mutated          | Pos   | Pos  |
| #8*         | M   | 58     | Nor          | RAI II    | mutated          | Neg   | Neg  |
| #9*         | M   | 79     | 13q-,17p-    | RAI 0     | unmutated        | Pos   | Pos  |
| #10         | M   | 72     | Nor          | RAI IV    | unmutated        | Pos   | Pos  |
| #11*        | F   | 67     | ND           | RAI 0     | mutated          | Neg   | Neg  |
| #12         | F   | 63     | 17p-         | RAI 0     | mutated          | Neg   | Neg  |
| #13         | M   | 77     | 12 +         | RAI II    | mutated          | Neg   | Neg  |
| #14         | M   | 75     | ND           | RAI III   | unmutated        | Pos   | Neg  |
| #15*        | M   | 73     | 13q-,11q-    | RAI IV    | unmutated        | Neg   | Pos  |
| #16         | M   | 67     | Nor          | RAI 0     | mutated          | Neg   | Neg  |
| #17*        | M   | 65     | 17p-         | RAI II    | mutated          | Neg   | Pos  |
| #18         | M   | 77     | 12+          | RAI IV    | mutated          | Neg   | Neg  |
| #19         | M   | 56     | 13q-         | RAI III   | unmutated        | Neg   | Neg  |
| #20         | M   | 73     | Nor          | RAI 0     | unmutated        | Pos   | Pos  |
| #21         | M   | 78     | 13q-,11q-    | RAI 0     | mutated          | Neg   | Neg  |
| #22*        | F   | 67     | Nor          | RAI II    | mutated          | Pos   | Neg  |
| #23         | M   | 66     | Nor          | RAI II    | mutated          | Neg   | Pos  |
| #24*        | M   | 64     | Nor          | RAI II    | mutated          | Neg   | Neg  |
| #25         | M   | 76     | 17p-         | RAI III   | mutated          | Neg   | Pos  |
| #26*        | M   | 71     | 13q-,17p-    | RAI 0     | unmutated        | Neg   | Neg  |
| #27         | F   | 70     | ND           | RAI III   | unmutated        | Pos   | Pos  |
| #28         | M   | 72     | ND           | RAI IV    | mutated          | Pos   | Neg  |
| #29         | M   | 67     | ND           | RAI IV    | mutated          | Pos   | Pos  |
| #30*        | F   | 62     | 13q-         | RAI 0     | unmutated        | Neg   | Pos  |
| #31*        | M   | 67     | ND           | RAI I     | unmutated        | Neg   | Neg  |
| #32         | M   | 74     | ND           | RAI II    | mutated          | Pos   | Pos  |
| #33*        | M   | 62     | 13q-         | RAI 0     | unmutated        | Neg   | Pos  |
| #34         | F   | 71     | ND           | RAI I     | mutated          | Neg   | Pos  |
| #35         | F   | 74     | 17p-         | RAI 0     | unmutated        | Neg   | Neg  |
| #36         | M   | 75     | ND           | RAI 0     | unmutated        | Neg   | Neg  |

ND: not determined; Nor, normal; +: trisomy; \*:chemonaive patient.
