# Supplementary material for: Synergistic Interactions between HDAC and Sirtuin Inhibitors in Human Leukemia Cells
Source: PubMed Central journal article supplement (PMC3144930; doi:10.1371/journal.pone.0022739), 2011-07-27
Supplement: pone.0022739.s022.pdf [file pone.0022739.s022.pdf]

**Table S7. Clinical and laboratory features of patients with AML**

| <b>Patient nr.</b> | <b>Sex</b> | <b>Age</b> | <b>Sample source</b> | <b>FAB Stage</b> | <b>% Blasts</b> |
|--------------------|------------|------------|----------------------|------------------|-----------------|
| #37                | M          | 53         | PB                   | M4               | 95              |
| #38                | F          | 50         | PB                   | M1               | 78              |
| #39                | M          | 80         | PB                   | secondary        | 90              |
| #40                | M          | 78         | PB                   | secondary        | 80              |
| #41                | M          | 79         | PB                   | secondary        | 70              |
| #42                | F          | 40         | PB                   | M4               | 95              |
| #43                | M          | 74         | PB                   | secondary        | 90              |
| #44                | M          | 45         | PB                   | M5               | 85              |
| #45                | M          | 68         | PB                   | M4               | 75              |
| #46                | F          | 70         | PB                   | M0/M1            | 90              |
| #47                | M          | 90         | PB                   | secondary        | 95              |
| #48                | M          | 70         | PB                   | M5               | 90              |

PB: peripheral blood.
